# Supplementary material for: Readiness to Implement the World Health Organization’s Integrated Care for Older People (ICOPE) Framework in Primary Health Care Settings in Nigeria: A Series of Focus Group Discussions
Source: Research Square preprint supplement (doi:10.21203/rs.3.rs-7344648/v1), 2025-11-03
Supplement: Supplementary file 1 [file eba2ee31c93d6b91bdf7c8b6.docx]

**Question guide**

| **SECTION** | **QUESTION QUIDE** |
| --- | --- |
| **Opening** | Can you share your experiences and perspective on providing care for older people? |
| **Warm-up** | How do you perceive our readiness to provide integrated care for older people at PHCs? |
| **Human Resource Challenges** | 1.What are the key human resource challenges faced in delivering care to older people at PHCs  2.How will staffing levels and skills mix impact the quality of care in the implementation of ICOPE  *Prompt:* In your opinion, what training and support do health and social workers need to enhance care for older people? |
| **Policy challenges** | 3.What policies or regulations are in place to promote collaboration between health and social workers?  4. How do existing policies influence the coordination of care across different providers and organisation?  *Prompt:* Are there specific policy gaps that needs to be addressed to improve the delivery of integrated care for older people? |
| **Solutions and recommendations** | 5.Based on your experiences, what strategies or interventions could enhance interprofessional collaboration in the care of older people?  6.How can policies be improved to better support integrated care for older people?  *Prompt:* In your ideal scenario, what policy changes would best support the implementation of integrated care? |
